# Supplementary material
Source: HighWire-hosted journal article supplement (https://innovations.bmj.com/content/7/2/422)
Supplement: inline-supplementary-material-3 [file inline-supplementary-material-3.pdf]

## Appendix 3

| Error Types                                                                      | Sentence(s) with error(s)                                                                                                                                                                                                                                               | Original sentence(s)                                                                                                                                           |
|----------------------------------------------------------------------------------|-------------------------------------------------------------------------------------------------------------------------------------------------------------------------------------------------------------------------------------------------------------------------|----------------------------------------------------------------------------------------------------------------------------------------------------------------|
| <b>Word insertion resulting in error (Transcription or Translation error)</b>    | Has your son ever had chickenpox, measles, mumps, whooping cough or tuberculosis or are all of your son's vaccinations up to date?<br><br><b>Error:</b> the word “or” was inserted – <b>1 error</b>                                                                     | Has your child ever had chickenpox, measles, mumps, whooping cough, or tuberculosis? Are all of your child’s vaccinations up to date?                          |
| <b>Word deletion resulting in error (Transcription or Translation error)</b>     | Like I said, doesn’t have symptoms that you’d feel. The itching is probably due to seasonal allergies or dry eyes from sun exposure.<br><br><b>Error:</b> the word glaucoma is missing – <b>1 error</b>                                                                 | Like I said, glaucoma doesn’t have symptoms that you’d feel. The itching is probably due to seasonal allergies or dry eyes from sun exposure.                  |
| <b>Word substitution resulting in error (Transcription or Translation error)</b> | Make sure to avoid any strenuous exercise and make sure to not hit your head and take precautions for that call or anything that could be dangerous.<br><br><b>Error:</b> “for that call” substituted “to prevent falling” - Three word substitutions – <b>3 errors</b> | Make sure that you avoid any strenuous exercise. Make sure you don’t hit your head, and take precautions to prevent falling or anything that can be dangerous. |
| <b>Inflection error (Speech Synthesis Error)</b>                                 | You are sexually active.<br><br><b>Error:</b> The sentences was inflected as a statement instead of as a question.                                                                                                                                                      | Are you sexually active?                                                                                                                                       |
| <b>Interruption error (Speech Synthesis Error)</b>                               | Has your son ever had chickenpox, measles, mumps, whooping cough or tuberculosis?<br><br><b>Error:</b> The second half of the passage was not interpreted because the application interrupted the speaker.                                                              | Has your child ever had chickenpox, measles, mumps, whooping cough, or tuberculosis? Are all of your child’s vaccinations up to date?                          |
| <b>Sentence-break error (Speech Synthesis Error)</b>                             | I’m very sorry that you seem very angry. Is there anything I can do for you?<br><br><b>Error:</b> No pause after “I’m so sorry” to signal the end of a sentence and insertion of “that”                                                                                 | I’m so sorry. You seem very upset. Is there anything I can do for you?                                                                                         |
| <b>Lack of interpretation error (Speech Synthesis Error)</b>                     | ------(GT does not speak)                                                                                                                                                                                                                                               | We need to discuss your medication plan before moving forward I'd like you to discontinue the iron medication 7 days before                                    |

|  |                                                                         |                                                                             |
|--|-------------------------------------------------------------------------|-----------------------------------------------------------------------------|
|  | <b>Error:</b> No interpretation—the application did not produce speech. | the procedure, the aspirin 10 days before the procedure and your arthritis. |
|--|-------------------------------------------------------------------------|-----------------------------------------------------------------------------|
